# Supplementary figures and images for: Identification and Comparison of Colletotrichum Secreted Effector Candidates Reveal Two Independent Lineages Pathogenic to Soybean
Source: MDPI journal article supplement (doi:10.3390/pathogens10111520), 2021-11-21

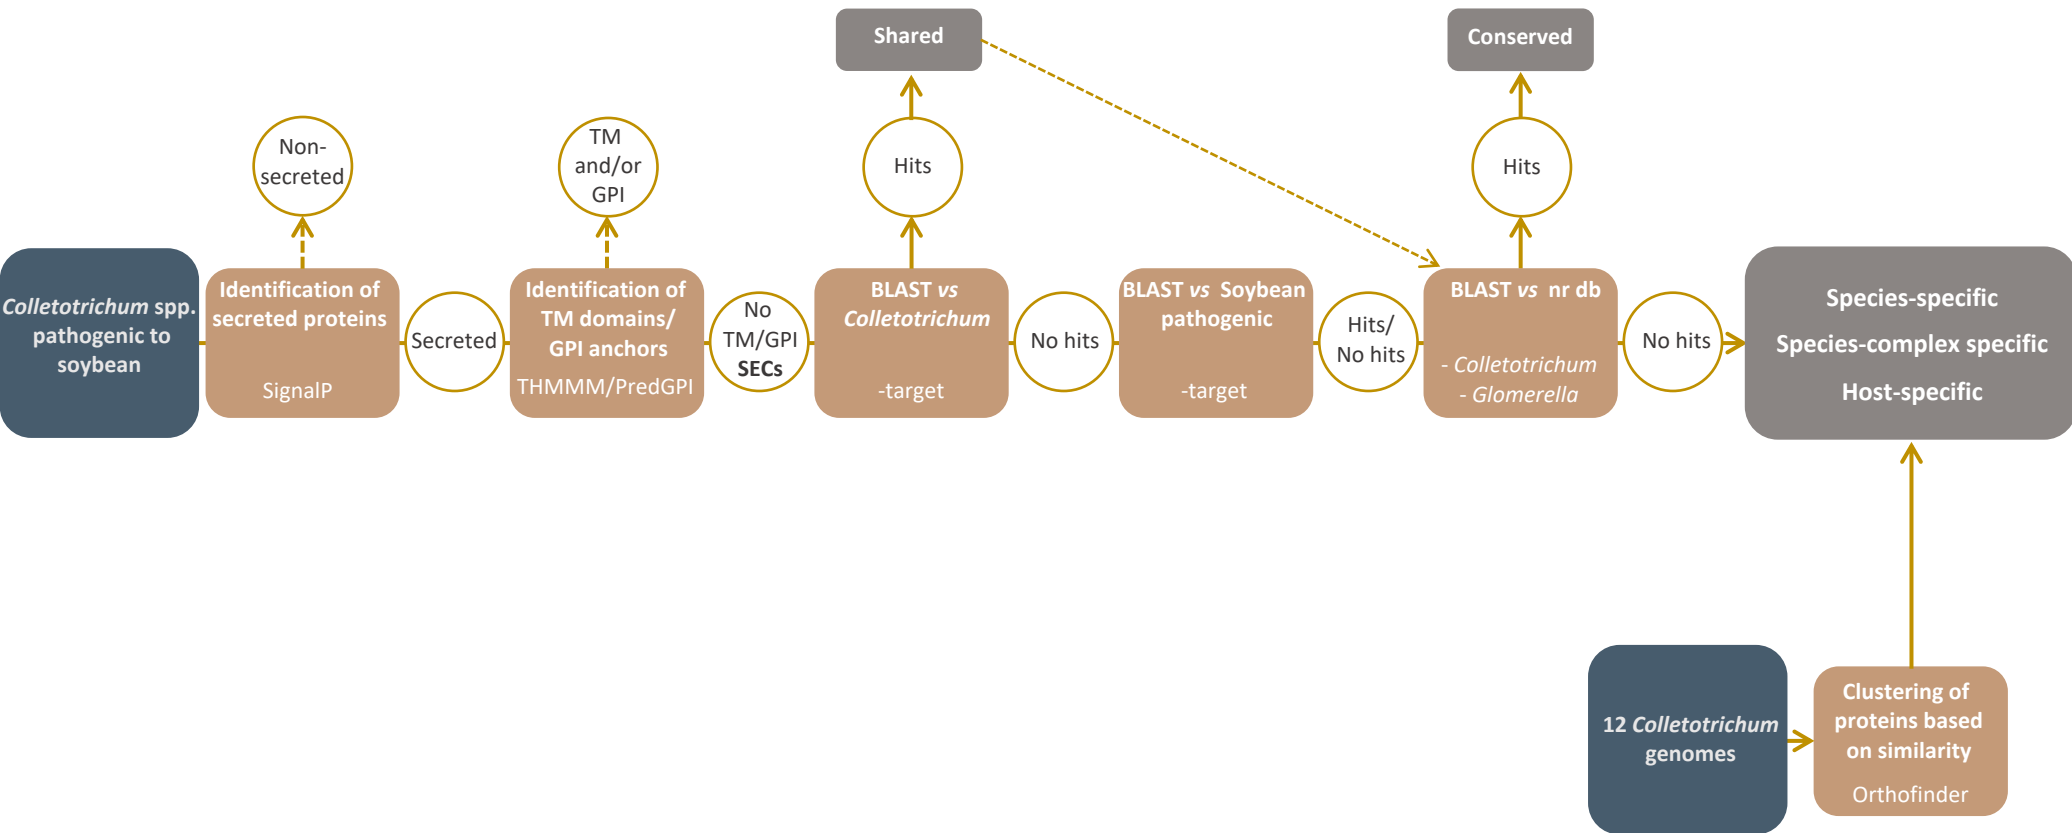

Supplement: s1 [file s1]
